# Supplementary material for: The influence of alkali-treated zeolite on the oxide–zeolite syngas conversion process
Source: Royal Society of Chemistry journal article supplement (doi:10.1039/c8cy01332b), 2018-01-01
Supplement: c8cy01332b1.pdf [file c8cy01332b1.pdf]

## Supplementary information

### **The influence of alkali- treated zeolite on the oxide-zeolite syngas conversion process**

Xiaoli Yang,<sup>ab</sup> Xiong Su,<sup>a</sup> Binglian Liang,<sup>ab</sup> Yaru Zhang,<sup>ab</sup> Hongmin Duan,<sup>a</sup> Junguo Ma,<sup>a</sup>  
Yanqiang Huang<sup>\*a</sup> and Tao Zhang<sup>ab</sup>

<sup>a</sup> State Key Laboratory of Catalysis, Dalian Institute of Chemical Physics, Chinese Academy of Sciences, No. 457 Zhongshan Road, Dalian 116023, P. R. China.

<sup>b</sup> University of Chinese Academy of Sciences, Beijing 100049, P. R. China.

\* Corresponding authors, E-mail: [yqhuang@dicp.ac.cn](mailto:yqhuang@dicp.ac.cn).

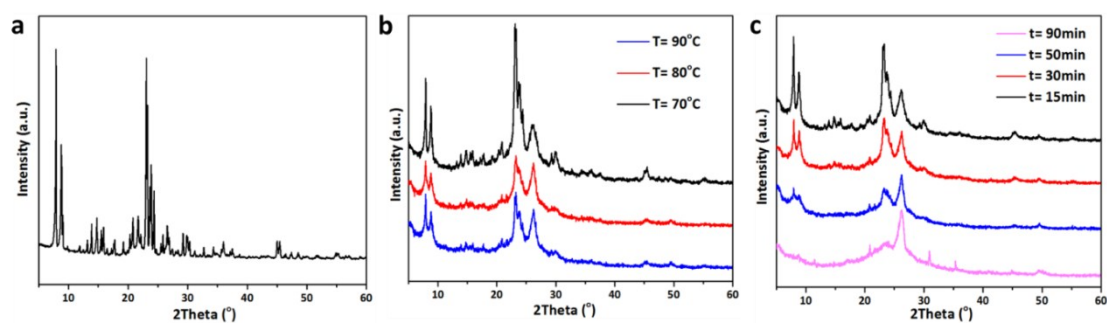

Fig. S1. XRD patterns of ZSM-5 treated at different conditions: (a) parent ZSM-5, (b) ZSM-5 treated with NaOH (0.5 mol L<sup>-1</sup>) at different temperature for 30 min, (c) ZSM-5 treated with NaOH (0.5 mol L<sup>-1</sup>) at 80 °C for different time.

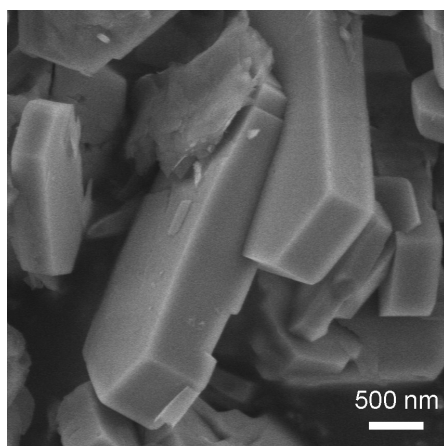

Fig. S2. SEM image of parent ZSM-5.

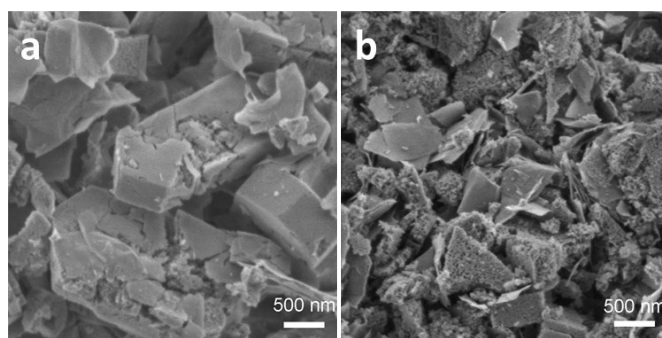

Fig. S3. SEM images of ZSM-5 treated with NaOH ( $0.5 \text{ mol L}^{-1}$ ) at (a) 70 °C and (b) 90 °C for 30 min.

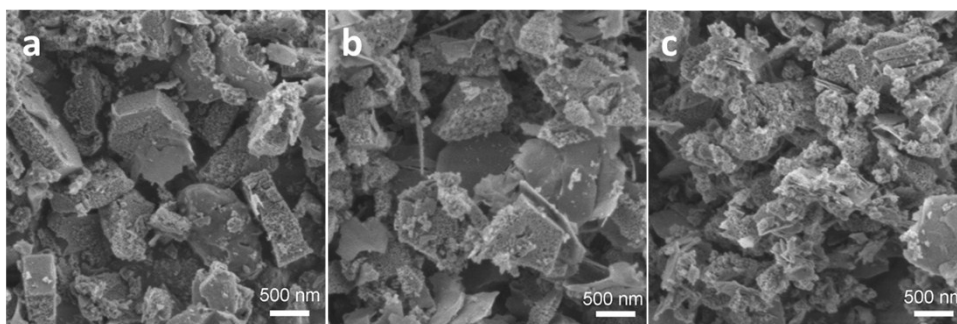

Fig. S4. SEM images of ZSM-5 treated with NaOH ( $0.5 \text{ mol L}^{-1}$ ) at 80 °C for different time (a) 15 min, (b) 50 min and (c) 90 min.

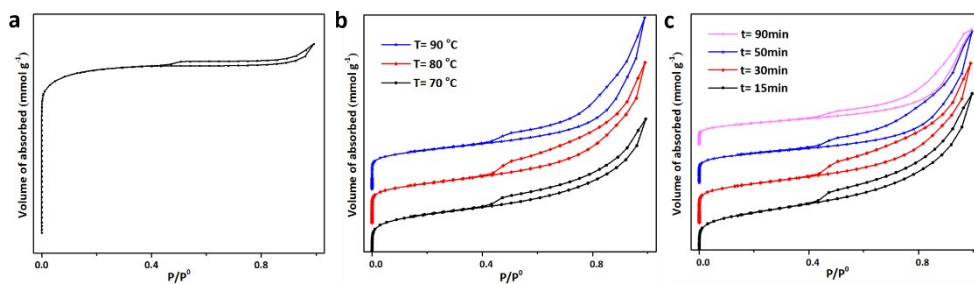

Fig. S5. Nitrogen adsorption-desorption isotherms of ZSM-5 treated at different conditions: (a) parent ZSM-5, (b) ZSM-5 treated with NaOH ( $0.5 \text{ mol L}^{-1}$ ) at different temperature for 30 min and (c) ZSM-5 treated with NaOH ( $0.5 \text{ mol L}^{-1}$ ) at  $80 \text{ }^{\circ}\text{C}$  for different time.

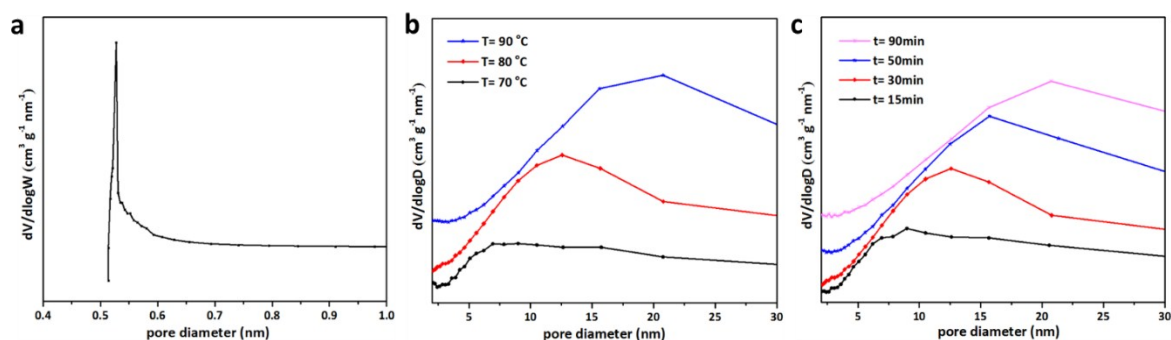

Fig. S6. The pore size distribution of ZSM-5 treated at different conditions: (a) parent ZSM-5, (b) ZSM-5 treated with NaOH ( $0.5 \text{ mol L}^{-1}$ ) at different temperature for 30 min, (c) ZSM-5 treated with NaOH ( $0.5 \text{ mol L}^{-1}$ ) at  $80 \text{ }^{\circ}\text{C}$  for different time.

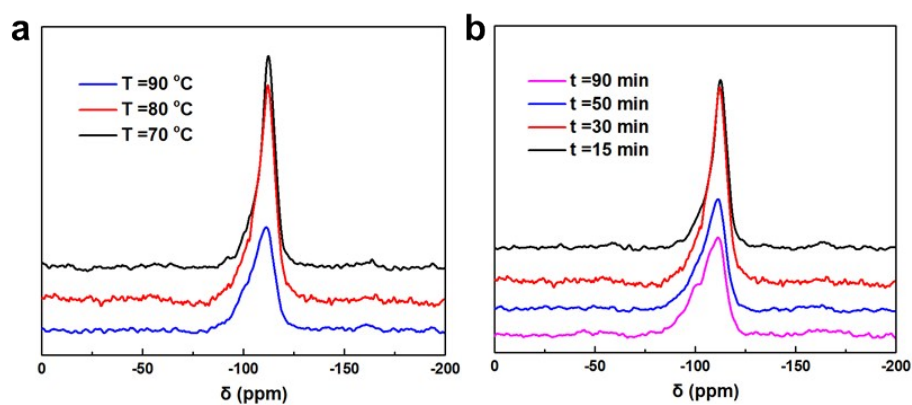

Fig. S7.  $^{29}\text{Si}$  MAS NMR spectra of ZSM-5 treated at different conditions: (a) ZSM-5 treated with NaOH (0.5 mol L<sup>-1</sup>) at different temperature for 30 min, (b) ZSM-5 treated with NaOH (0.5 mol L<sup>-1</sup>) at 80 °C for different time.

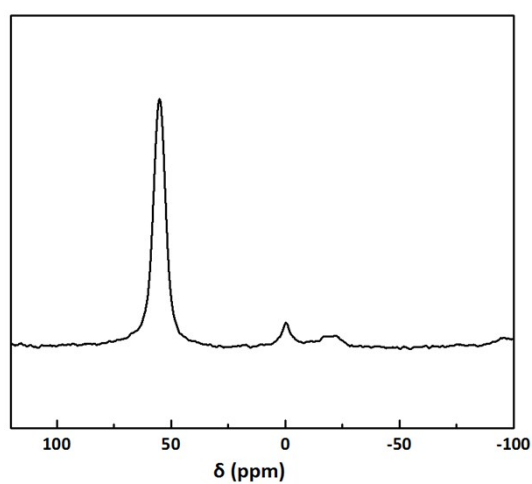

Fig. S8.  $^{27}\text{Al}$  MAS NMR spectra of parent ZSM-5.

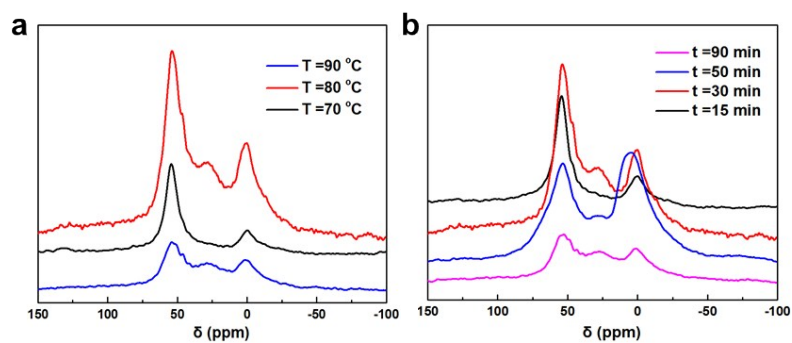

Fig. S9.  $^{27}\text{Al}$  MAS NMR spectra of ZSM-5 treated at different conditions: (a) ZSM-5 treated with NaOH (0.5 mol L<sup>-1</sup>) at different temperature for 30 min, (b) ZSM-5 treated with NaOH (0.5 mol L<sup>-1</sup>) at 80 °C for different time.

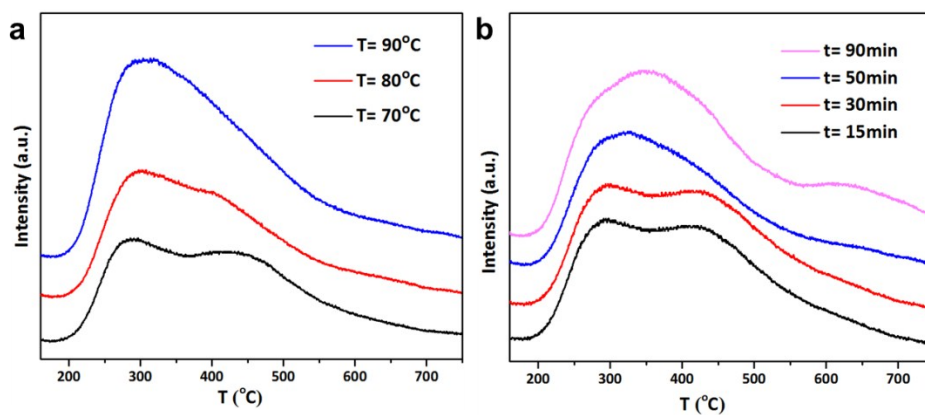

Fig. S10. NH<sub>3</sub>-TPD spectra of ZSM-5 treated at different conditions: (a) ZSM-5 treated with NaOH (0.5 mol L<sup>-1</sup>) at different temperature for 30 min and (b) ZSM-5 treated with NaOH (0.5 mol L<sup>-1</sup>) at 80 °C for different time.

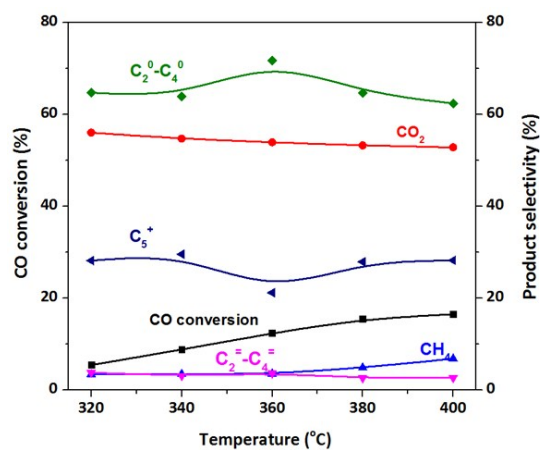

Fig. S11. The CO conversion and product selectivity of syngas conversion at different reaction temperature for composite catalyst containing Zn-Cr oxide and parent ZSM-5.

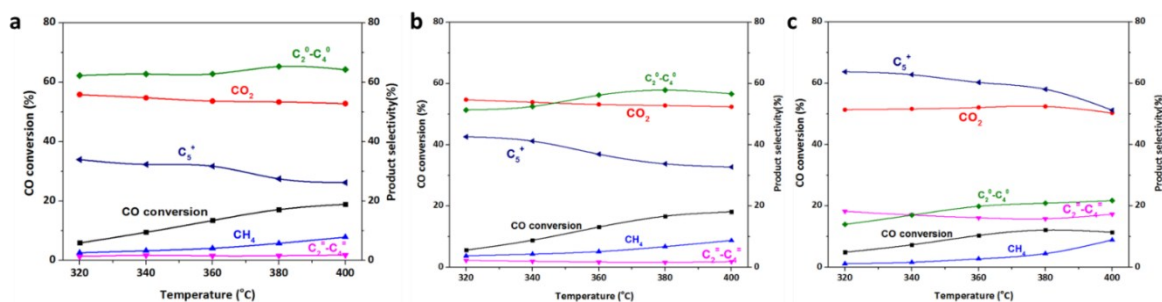

Fig. S12. The CO conversion and product selectivity of syngas conversion at different reaction temperature for composite catalyst containing Zn-Cr oxide and ZSM-5 treated by NaOH with different concentrations at 80 °C for 30 min: (a) 0.1 mol L<sup>-1</sup>, (b) 0.2 mol L<sup>-1</sup> and (c) 1.0 mol L<sup>-1</sup>.

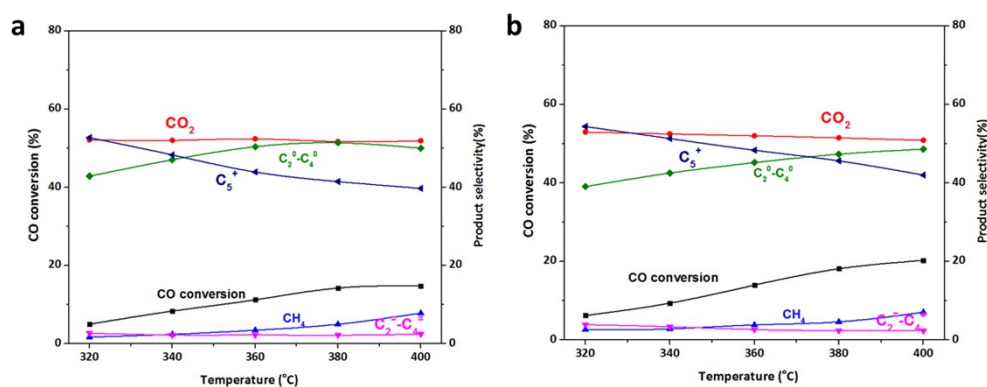

Fig. S13. The CO conversion and product selectivity of syngas conversion at different reaction temperature for composite catalyst containing Zn-Cr oxide and ZSM-5 treated with NaOH (0.5 mol L<sup>-1</sup>) at different temperature for 30 min: (a) 70 °C and (b) 90 °C.

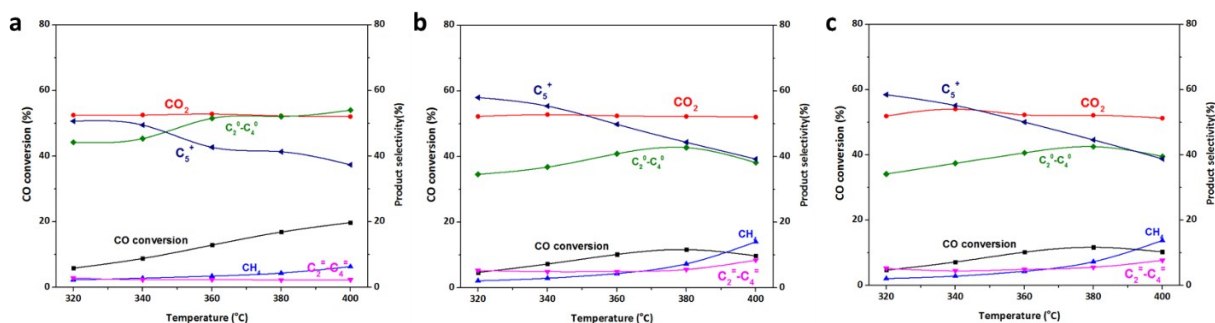

Fig. S14. The CO conversion and product selectivity of syngas conversion at different reaction temperature for composite catalyst containing Zn-Cr oxide and ZSM-5 treated with NaOH (0.5 mol L<sup>-1</sup>) at 80 °C for different time: (a) 15 min, (b) 50 min and (c) 90 min.

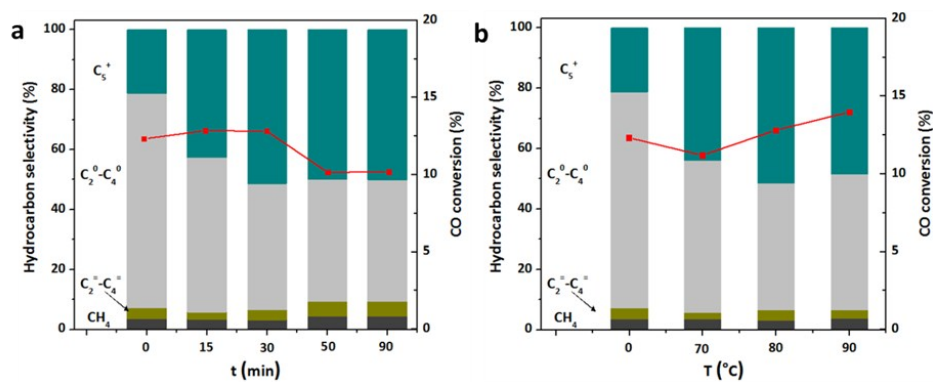

Fig. S15. Hydrocarbon selectivity and CO conversion of syngas conversion at 360 °C for composite catalyst containing Zn-Cr oxide and ZSM-5: (a) treated with NaOH (0.5 mol L<sup>-1</sup>) at different temperature for 30 min and (b) treated with NaOH (0.5 mol L<sup>-1</sup>) at 80 °C for different time.

Table S1. The product distribution of liquid phase for composite catalyst containing Zn-Cr oxide and ZSM-5 treated with NaOH (0.5 mol L<sup>-1</sup>) at 80 °C for 30 min.

| Main product             | Content |
|--------------------------|---------|
| Toluene                  | 1.18%   |
| p-xylene                 | 11.52%  |
| o-xylene                 | 3.61%   |
| m-trimethylbenzene       | 34.94%  |
| 0-trimethylbenzene       | 3.22%   |
| tetramethylbenzene       | 20.14%  |
| O-methyl ethyl benzene   | 2.26%   |
| O-dimethyl ethyl benzene | 1.23%   |
| pentamethylbenzene       | 3.12%   |
| Others                   | 18.78%  |

Table S2 The acid strength distribution of NaZSM-5 and HZSM-5 zeolite.

| sample  | Medium acid<br>/ mmol g <sup>-1</sup> | Strong acid<br>/ mmol g <sup>-1</sup> | Total acid<br>/mmol g <sup>-1</sup> | M/S acid | 150 °C                          |                                 |      |
|---------|---------------------------------------|---------------------------------------|-------------------------------------|----------|---------------------------------|---------------------------------|------|
|         |                                       |                                       |                                     |          | B acid<br>/mmol g <sup>-1</sup> | L acid<br>/mmol g <sup>-1</sup> | B/L  |
| HZSM-5  | 0.12                                  | 0.25                                  | 0.37                                | 0.48     | 0.39                            | 0.34                            | 1.16 |
| NaZSM-5 | 0.26                                  | 0.11                                  | 0.37                                | 2.34     | 0.06                            | 0.37                            | 0.16 |
